# Supplementary material
Source: PubMed Central journal article supplement (PMC7518133)
Supplement: Auerbach_Appendix_Table_Hospitals.pdf [file Auerbach_Appendix_Table_Hospitals.pdf]

APPENDIX TABLE:

| <b>Hospital name</b>                                                                            | <b>Region Division</b> | <b>Beds</b> | <b>Type</b> |
|-------------------------------------------------------------------------------------------------|------------------------|-------------|-------------|
| Barnes Jewish Hospital/Washington University St. Louis                                          | West North Central     | 1,400       | Academic    |
| Baylor Scott & White Medical Center Temple                                                      | West South Central     | 636         | Academic    |
| Beth Israel Deaconess Medical Center                                                            | New England            | 673         | Academic    |
| Brigham and Women's Hospital                                                                    | New England            | 793         | Academic    |
| Cedars-Sinai Medical Center                                                                     | Pacific                | 886         | Academic    |
| ChristianaCare                                                                                  | South Atlantic         | 1,227       | Academic    |
| Cleveland Clinic                                                                                | East North Central     | 1,300       | Academic    |
| Dartmouth-Hitchcock Medical Center                                                              | New England            | 422         | Academic    |
| Dell Seton Medical Center/UT Austin                                                             | West South Central     | 430         | Academic    |
| Denver Health and Hospitals Authority                                                           | Mountain               | 525         | Safety Net  |
| Emory University Hospital                                                                       | South Atlantic         | 733         | Academic    |
| Evanston Hospital/NorthShore                                                                    | East North Central     | 354         | Academic    |
| Froedtert Hospital/Medical College of Wisconsin                                                 | East North Central     | 607         | Academic    |
| Harborview Medical Center                                                                       | Pacific                | 413         | Safety Net  |
| Johns Hopkins Hospital                                                                          | South Atlantic         | 1,162       | Academic    |
| Johns Hopkins Bayview Medical Center                                                            | South Atlantic         | 420         | Safety Net  |
| Maine Medical Center                                                                            | New England            | 637         | Academic    |
| Massachusetts General Hospital                                                                  | New England            | 999         | Academic    |
| Mayo Clinic Rochester                                                                           | West North Central     | 2,059       | Academic    |
| Miriam Hospital                                                                                 | New England            | 247         | Academic    |
| Mount Sinai Hospital                                                                            | Middle Atlantic        | 1,141       | Academic    |
| Northwestern Memorial Hospital                                                                  | East North Central     | 894         | Academic    |
| Ohio State University Wexner Medical Center                                                     | East North Central     | 1,397       | Academic    |
| Oregon Health & Science University                                                              | Pacific                | 556         | Academic    |
| Penn Medicine (Hospital of the University of Pennsylvania and Penn Presbyterian Medical Center) | Middle Atlantic        | 776         | Academic    |
| Robert Wood Johnson University Hospital/Rutgers                                                 | Middle Atlantic        | 965         | Academic    |
| Stanford                                                                                        | Pacific                | 605         | Academic    |

|                                                           |                    |       |            |
|-----------------------------------------------------------|--------------------|-------|------------|
| Tulane Hospital and University Medical Center             | West South Central | 235   | Academic   |
| UC San Diego                                              | Pacific            | 808   | Academic   |
| UC San Francisco                                          | Pacific            | 796   | Academic   |
| UCLA Ronald Reagan Hospital                               | Pacific            | 520   | Academic   |
| UK HealthCare                                             | East South Central | 945   | Academic   |
| University of Chicago                                     | East North Central | 811   | Academic   |
| University of Colorado Denver Anschutz Medical Campus     | Mountain           | 400   | Academic   |
| University of Florida Shands Hospital                     | South Atlantic     | 1,162 | Academic   |
| University of Iowa Hospitals and Clinics                  | West North Central | 811   | Academic   |
| University of Miami Hospital                              | South Atlantic     | 560   | Academic   |
| University of Michigan                                    | East North Central | 1,000 | Academic   |
| University of Missouri-Columbia Hospital                  | West North Central | 247   | Academic   |
| University of Nebraska Medical Center / Nebraska Medicine | West North Central | 800   | Academic   |
| University of North Carolina at Chapel Hill               | South Atlantic     | 950   | Academic   |
| University of Pittsburgh Medical Center Presbyterian      | Middle Atlantic    | 680   | Academic   |
| University of Vermont Medical Center                      | New England        | 562   | Academic   |
| University of Washington Medical Center                   | Pacific            | 570   | Academic   |
| University of Wisconsin Hospital and Clinics              | East North Central | 505   | Academic   |
| UW-Northwest                                              | Pacific            | 281   | Academic   |
| Vanderbilt University Medical Center                      | East South Central | 1,019 | Academic   |
| Wake Forest Baptist                                       | South Atlantic     | 1,535 | Academic   |
| Weill Cornell                                             | Middle Atlantic    | 862   | Academic   |
| Yale New Haven Hospital                                   | New England        | 1,541 | Academic   |
| Zuckerberg San Francisco General Hospital                 | Pacific            | 397   | Safety Net |
| Baystate Health                                           | New England        | 724   | Academic   |
| Boston University                                         | New England        | 496   | Academic   |
| BSWH University Medical Center-Dallas                     | West South Central | 1,025 | Academic   |
| Columbia University                                       | Middle Atlantic    | 738   | Academic   |
| Duke                                                      | South Atlantic     | 979   | Academic   |

|                                       |                    |       |          |
|---------------------------------------|--------------------|-------|----------|
| Louisiana State University            | West South Central | 446   | Academic |
| Loyola University                     | East North Central | 254   | Academic |
| Medical University of South Carolina  | South Atlantic     | 1,600 | Academic |
| Montefiore                            | Middle Atlantic    | 1,491 | Academic |
| NYU Langone                           | Middle Atlantic    | 725   | Academic |
| Penn State University                 | Middle Atlantic    | 548   | Academic |
| Pennington Biomedical Research Center | West South Central |       |          |
| Rush University                       | East North Central | 697   | Academic |
| UC Davis                              | Pacific            | 617   | Academic |
| UC Irvine                             | Pacific            | 422   | Academic |
| University of Illinois                | East North Central | 462   | Academic |
| University of Kansas Medical Center   | West North Central | 910   | Academic |
| University of Minnesota               | West North Central | 743   | Academic |
| University of Southern California     | Pacific            | 600   | Academic |
| University of Texas Houston           | West South Central | 514   | Academic |
| University of Utah                    | Mountain           | 527   | Academic |
| UT Southwestern                       | West South Central | 640   | Academic |
